# Supplementary material for: Prenatal mercury exposure, fish intake and child emotional behavioural regulation in the Norwegian Mother, Father and Child Cohort Study
Source: HighWire-hosted journal article supplement (doi:10.1136/bmjnph-2021-000412), 2022-11-15
Supplement: bmjnph-2021-000412supp001_data_supplement.pdf [file bmjnph-2021-000412supp001_data_supplement.pdf]

# Supplementary Tables

Supplementary table S1. Child Behaviour Checklist (CBCL) – items used from the MoBa questionnaires at 3 year and 5 year. Sorted by internalizing and externalizing items.

**The following list contains statements describing children's behavior and manner from the age of 2-3.**

## Items on the internalizing scale

- Clings to adults or too dependent
- Constipated, doesn't move bowels
- Disturbed by any change in routine
- Doesn't eat well
- Gets too upset when separated from parents
- Stomach aches or cramps (without medical cause)
- Sudden changes in moods or feelings
- Too fearful or anxious
- Vomiting, throwing up (without medical cause)

## Items on the externalizing scale

- Can't concentrate, can't pay attention for long
- Can't sit still, restless or overactive
- Can't stand waiting, wants everything now
- Defiant
- Demands must be met immediately
- Gets in many fights
- Hits others
- Poorly coordinated or clumsy
- Punishment doesn't change his/her behavior
- Quickly shifts from one activity to another

**The following list contains statements describing children's behavior from the age of 5.**

## Items on the internalizing scale

- Clings to adults or too dependent
- Disturbed by any change in routine
- Doesn't eat well

- Gets too upset when separated from parents
- Stomach aches or cramps (without medical cause)
- Too fearful or anxious
- Unhappy, sad or depressed
- Vomiting, throwing up (without medical cause)
- Feelings are easily hurt

Items on the externalizing scale

- Can't concentrate, can't pay attention for long
- Can't sit still, restless or overactive
- Can't stand waiting, wants everything now
- Defiant
- Demands must be met immediately
- Doesn't seem to feel guilty after misbehaving
- Gets in many fights
- Hits other
- Poorly coordinated or clumsy
- Punishment doesn't change his/her behavior

To what extent are the following statements true of your child's behavior during the last two months? Options:

1-Not true

2-Somewhat or sometimes true

3-Very true or often true

Supplementary Table S2. Description of prenatal dietary mercury exposure and demographic variables in the study sample for participants with information about child behavior at child age 3 and 5 years.

|                                      | Answered 3-year questionnaire |                  | Answered 5-year questionnaires* |                  |
|--------------------------------------|-------------------------------|------------------|---------------------------------|------------------|
|                                      | N                             | mean (SD) median | N                               | mean (SD) median |
| Mercury µg per day                   | 51,238                        | 1.63 (0.99) 1.47 | 31,737                          | 1.63 (0.97) 1.50 |
| Mercury µg/ kg bw/ week**            | 50,301                        | 0.17 (0.11) 0.15 | 31,262                          | 0.18 (0.11) 0.16 |
| Maternal age at delivery             |                               | %                |                                 | %                |
| <25 years                            | 4542                          | 8.9              | 2354                            | 7.4              |
| 25-29 years                          | 16,996                        | 33.2             | 10,232                          | 32.2             |
| 30-34 years                          | 23,175                        | 45.2             | 14,795                          | 46.6             |
| ≥35 years                            | 6225                          | 12.7             | 4356                            | 13.7             |
| Parity                               |                               |                  |                                 |                  |
| nulliparous                          | 24,971                        | 48.7             | 15,798                          | 49.8             |
| multiparous                          | 26,267                        | 51.3             | 15,939                          | 50.2             |
| Maternal education                   |                               |                  |                                 |                  |
| ≤12 years                            | 13,418                        | 26.2             | 7007                            | 22.1             |
| 13-16 years                          | 22,535                        | 44.0             | 14,215                          | 44.8             |
| ≥17 years                            | 14,317                        | 27.9             | 9950                            | 31.4             |
| missing                              | 968                           | 1.9              | 565                             | 1.8              |
| Maternal income                      |                               |                  |                                 |                  |
| < 300,000 NOK per year               | 29,617                        | 57.8             | 16,768                          | 52.8             |
| ≥ 300,000 NOK per year               | 20,140                        | 39.3             | 14,188                          | 44.7             |
| missing                              | 1481                          | 2.9              | 781                             | 2.5              |
| Smoking during pregnancy             |                               |                  |                                 |                  |
| no smoking                           | 47,755                        | 93.2             | 30,106                          | 94.9             |
| occasional smoking                   | 1121                          | 2.2              | 554                             | 1.7              |
| daily smoking                        | 2028                          | 4.0              | 885                             | 2.8              |
| missing                              | 334                           | 0.7              | 192                             | 0.6              |
| Pre-pregnancy BMI, kg/m <sup>2</sup> |                               |                  |                                 |                  |
| <18.5                                | 33,446                        | 65.3             | 21,054                          | 66.3             |
| 18.5-24.9                            | 1422                          | 2.8              | 888                             | 2.8              |
| 25-29.9                              | 10,816                        | 21.1             | 6649                            | 21.0             |
| ≥30                                  | 4451                          | 8.7              | 2581                            | 8.1              |
| missing                              | 1103                          | 2.2              | 565                             | 1.8              |
| Weekly fish servings                 |                               |                  |                                 |                  |
| 0                                    | 1498                          | 2.9              | 851                             | 2.7              |
| 1                                    | 22,109                        | 43.1             | 13,740                          | 43.3             |
| 2                                    | 21,102                        | 41.2             | 13,188                          | 41.6             |
| 3                                    | 3139                          | 6.1              | 1926                            | 6.1              |
| ≥4                                   | 3390                          | 6.6              | 2032                            | 6.4              |

\* Participants that answered the five-year questionnaire were included if they had also answered the three-year questionnaire and the CBCL score. The number of participants that answered the CBCL externalizing score were n= 31,737, while n=31,624 participants answered the CBCL internalizing score. In this overview we present demographics based on participants that answered the CBCL externalizing score.

\*\*Missing due to missing reports of maternal body weight.

Abbreviations: NOK; Norwegian Kroner

Supplementary Table S3. Description of maternal blood mercury ( $\mu\text{g/L}$ ) concentration and demographic variables for participants with information about child behavior at age 3 and 5 years.

|                                          | Answered 3-year questionnaire |                  | Answered 5-year questionnaires* |                  |
|------------------------------------------|-------------------------------|------------------|---------------------------------|------------------|
|                                          | N                             | Mean (SD) median | N                               | Mean (SD) median |
| Blood mercury levels ( $\mu\text{g/L}$ ) | 2936                          | 1.21 (0.93) 1.02 | 2226                            | 1.21(0.93) 1.03  |
| Maternal age at delivery                 |                               | %                |                                 | %                |
| <25 years                                | 236                           | 8.0              | 161                             | 7.3              |
| 25-29 years                              | 1033                          | 35.2             | 755                             | 34.1             |
| 30-34 years                              | 1341                          | 45.7             | 1043                            | 47.1             |
| $\geq 35$ years                          | 326                           | 11.1             | 256                             | 11.6             |
| Parity                                   |                               |                  |                                 |                  |
| nulliparous                              | 1513                          | 51.5             | 1104                            | 49.8             |
| multiparous                              | 1423                          | 48.5             | 1111                            | 50.2             |
| Maternal education                       |                               |                  |                                 |                  |
| $\leq 12$ years                          | 755                           | 25.7             | 511                             | 23.1             |
| 13-16 years                              | 1380                          | 47.0             | 1066                            | 48.1             |
| $\geq 17$ years                          | 738                           | 25.1             | 590                             | 26.6             |
| missing                                  | 63                            | 2.1              | 48                              | 2.2              |
| Maternal income                          |                               |                  |                                 |                  |
| < 300,000 NOK per year                   | 1803                          | 61.4             | 1329                            | 60.0             |
| $\geq 300,000$ NOK per year              | 1058                          | 36.0             | 834                             | 37.7             |
| missing                                  | 75                            | 2.6              | 52                              | 2.3              |
| Smoking during pregnancy                 |                               |                  |                                 |                  |
| no smoking                               | 2749                          | 93.6             | 2100                            | 94.8             |
| occasional smoking                       | 66                            | 2.2              | 44                              | 2.0              |
| daily smoking                            | 106                           | 3.6              | 60                              | 2.7              |
| missing                                  | 15                            | 0.5              | 11                              | 0.5              |
| Pre-pregnancy BMI, $\text{kg/m}^2$       |                               |                  |                                 |                  |
| <18.5                                    | 1889                          | 64.3             | 1436                            | 64.8             |
| 18.5-24.9                                | 89                            | 3.0              | 64                              | 2.9              |
| 25-29.9                                  | 677                           | 23.1             | 516                             | 23.3             |
| $\geq 30$                                | 226                           | 7.7              | 160                             | 7.2              |
| missing                                  | 55                            | 1.9              | 39                              | 1.8              |
| Weekly fish servings                     |                               |                  |                                 |                  |
| 0                                        | 91                            | 3.1              | 58                              | 2.6              |
| 1                                        | 1312                          | 44.7             | 981                             | 44.3             |
| 2                                        | 1213                          | 41.3             | 934                             | 42.2             |
| 3                                        | 169                           | 5.8              | 126                             | 5.7              |
| $\geq 4$                                 | 151                           | 5.1              | 116                             | 5.2              |

\* Participants that answered the five-year questionnaire were included if they had also answered the three-year questionnaire and the CBCL score. The number of participants that answered the CBCL externalizing score were  $n = 2226$  while only  $n = 2215$  participants had answered the CBCL internalizing score. In this overview we are presenting demographics based on participants that answered the CBCL externalizing score.

Supplementary Table S4. Calculated dietary methylmercury (MeHg) intake and maternal blood mercury (Hg) concentration by quintiles of maternal fish intake.

| Fish intake quintile range (g/week) | MeHg ( $\mu\text{g}/\text{kg}$ bw/week) mean (IQR) | Blood Hg ( $\mu\text{g}/\text{L}$ ) mean (IQR) |
|-------------------------------------|----------------------------------------------------|------------------------------------------------|
| <95                                 | 0.06 (0.03, 0.09)                                  | 0.87 (0.38, 1.15)                              |
| 96-153                              | 0.12 (0.09, 0.15)                                  | 1.10 (0.53, 1.44)                              |
| 154-210                             | 0.17 (0.13, 0.20)                                  | 1.26 (0.67, 1.59)                              |
| 211-291                             | 0.21 (0.16, 0.25)                                  | 1.37 (0.71, 1.73)                              |
| 292-1850                            | 0.30 (0.22, 0.36)                                  | 1.51 (0.85, 1.92)                              |
